# Supplementary figures and images for: Liangxue Tongyu Prescription Alleviates Brain Damage in Acute Intracerebral Hemorrhage Rats by Regulating Intestinal Mucosal Barrier Function
Source: Hindawi journal article supplement (doi:10.1155/2022/2197763), 2022-12-17

(a) NEG

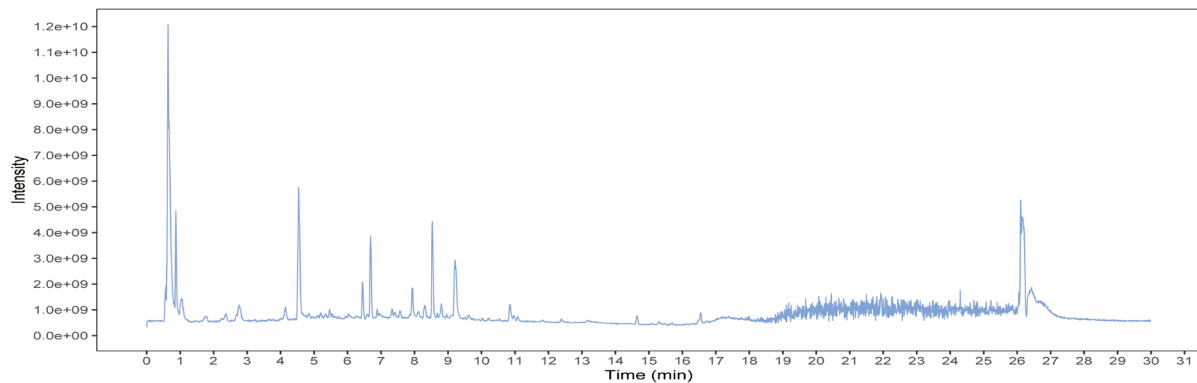

(b) POS

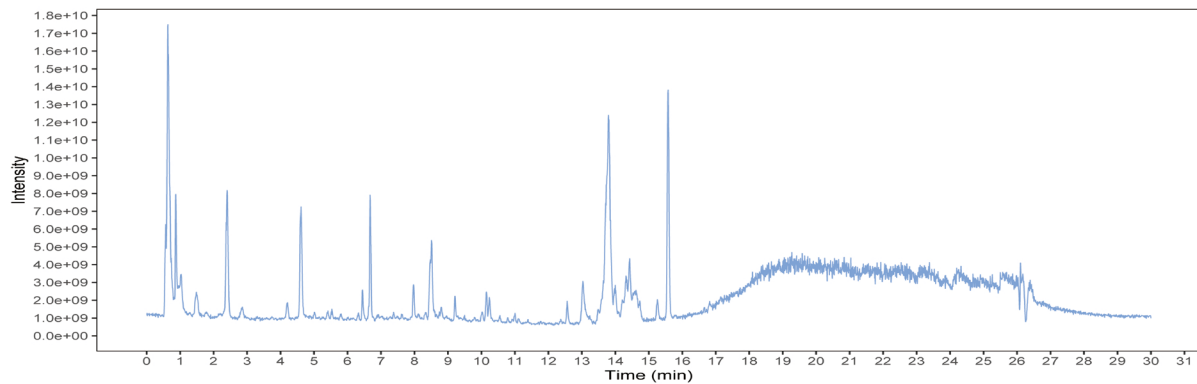

Supplement: f1 [file 2197763.f1.zip]
